# Supplementary material for: Development of an NO2 Gas Sensor Based on Laser-Induced Graphene Operating at Room Temperature
Source: MDPI journal article supplement (doi:10.3390/s24103217), 2024-05-18
Supplement: s1 [file s1]

Supplementary Materials for

# Development of an NO<sub>2</sub> Gas Sensor Based on Laser-Induced Graphene Operating at Room Temperature

Gizem Soydan <sup>1</sup>, Ali Fuat Ergenc <sup>2</sup>, Ahmet T. Alpas <sup>3</sup> and Nuri Solak <sup>1,\*</sup>

<sup>1</sup> Department of Metallurgical and Materials Engineering, Istanbul Technical University, Istanbul 34469, Turkey; soydan@itu.edu.tr

<sup>2</sup> Department of Control and Automation Engineering, Istanbul Technical University, Istanbul 34469, Turkey; ergenca@itu.edu.tr

<sup>3</sup> Department of Mechanical, Automotive and Materials Engineering, University of Windsor, Windsor, ON N9B 3P4, Canada; aalpas@uwindsor.ca

\* Correspondence: solaknu@itu.edu.tr

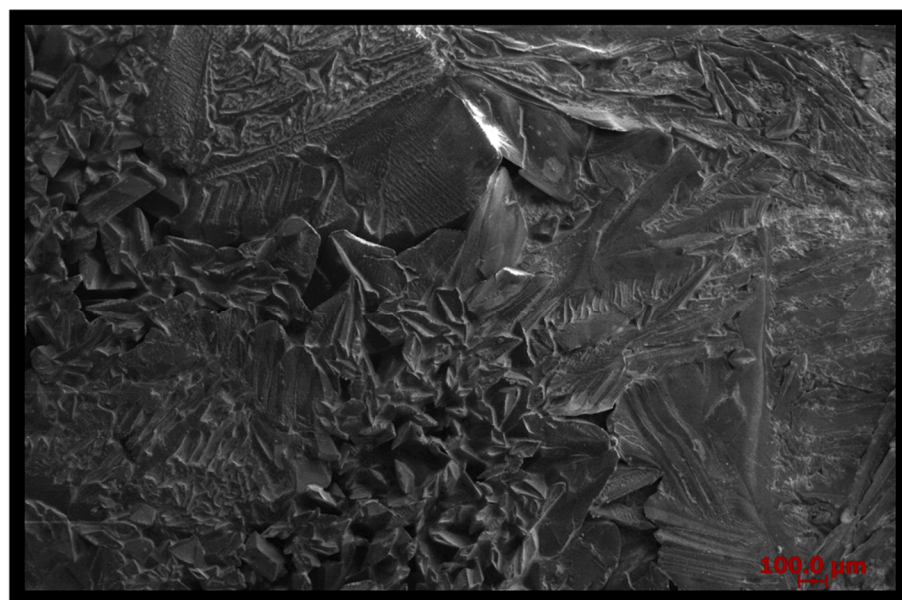

**Figure S1.** SEM image of SnO<sub>2</sub>/LIG structure without citric acid.

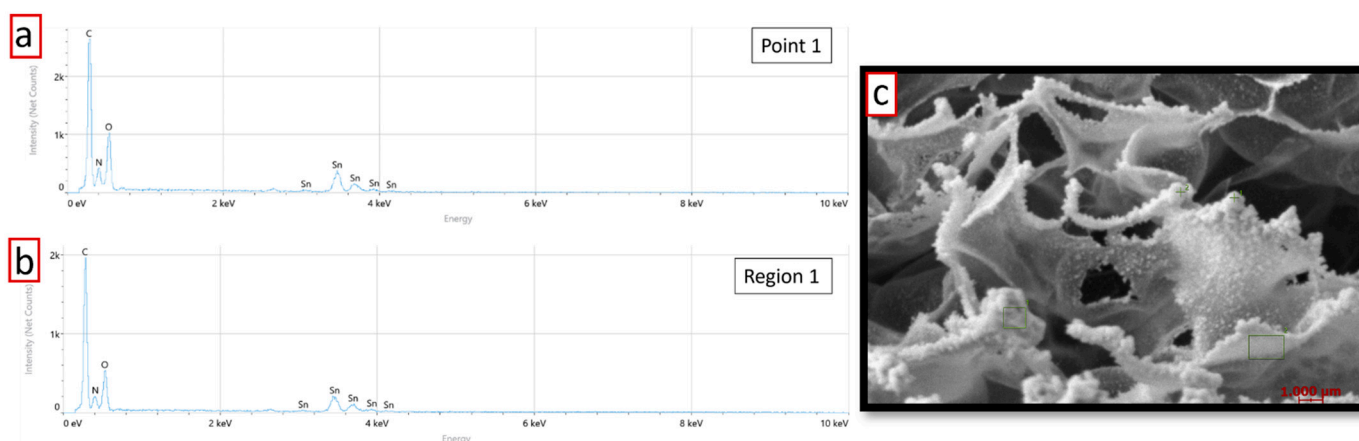

**Figure S2.** (a,b) EDS spectra and (c) SEM image of LIG SnO<sub>2</sub>.

**Table S1.** EDS results of  $\text{LIG}/\text{SnO}_2$ .

| Element | Point 1  |          | Region 1 |          |
|---------|----------|----------|----------|----------|
|         | Atomic % | Weight % | Atomic % | Weight % |
| C       | 40.5     | 18.0     | 44.5     | 20.0     |
| N       | 5.1      | 2.6      | 5.6      | 3.0      |
| O       | 42.1     | 25.0     | 37.7     | 22.6     |
| Sn      | 12.3     | 54.3     | 12.2     | 54.4     |

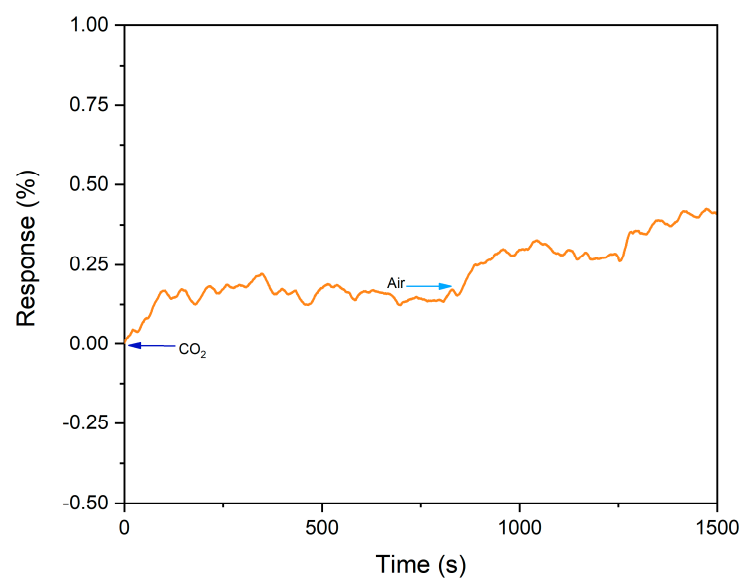

**Figure S3.** The response-time plot of  $\text{LIG}/\text{SnO}_2$  sample towards 20,000 ppm  $\text{CO}_2$ .
